# Supplementary material for: The effects of being habitually barefoot on foot mechanics and motor performance in children and adolescents aged 6–18 years: study protocol for a multicenter cross‐sectional study (Barefoot LIFE project)
Source: Springer Nature journal article supplement (doi:10.1186/s13047-016-0166-1), 2016-01-01
Supplement: MOESM2 [file 10645720]

Name:

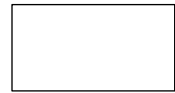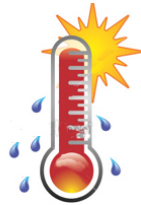

### Questionnaire on how often you wear shoes

**Circle how often you wear shoes at school:**

---

*Almost never*

*Half of the time*

*Almost always*

---

**Circle how often you wear shoes during sport activities:**

---

*Almost never*

*Often*

*Almost always*

---

**Circle how often you wear shoes in and around the home:**

---

*Almost never*

*Often*

*Almost always*

---

## SECONDARY SCHOOL

Circle how often you wore shoes at primary school:

---

*Almost never*

*Often*

*Almost always*

---

Circle how often you wore shoes during sport activities at primary school:

---

*Almost never*

*Often*

*Almost always*

---

Circle how often you wore shoes in and around the home while you were at primary school:

---

*Almost never*

*Often*

*Almost always*

---

**Baie dankie! Thank you! Enkosi!**
