# Supplementary material for: The effects of being habitually barefoot on foot mechanics and motor performance in children and adolescents aged 6–18 years: study protocol for a multicenter cross‐sectional study (Barefoot LIFE project)
Source: Springer Nature journal article supplement (doi:10.1186/s13047-016-0166-1), 2016-01-01

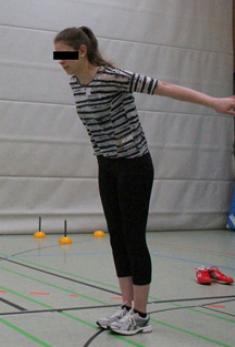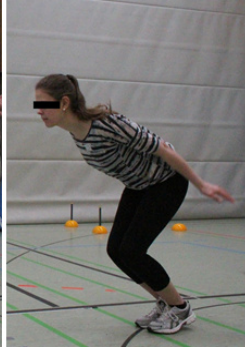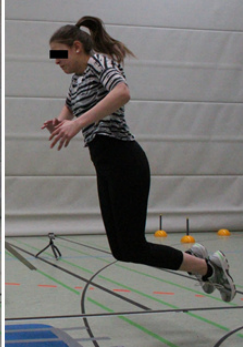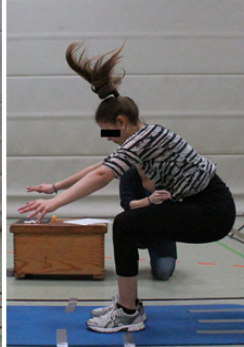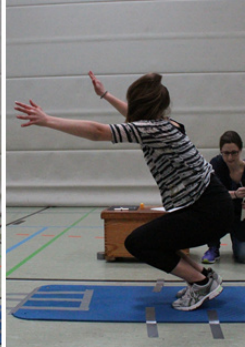

Supplement: MOESM4 [file 10645720]
